# Supplementary material
Source: publisher figshare collection journal article supplement (https://tandf.figshare.com/ndownloader/files/12355115)
Supplement: Supplementary file 1 [file 12355115]

**Appendix 1** Land Use Classes

| Land use classes* | Original Sub land use classes at level 3 |
| --- | --- |
| Abandoned area  Paddy rice  Built up area  Rubber plantation  Mixed orchard  Cassava/sugarcane  Corn  Deciduous forest  Evergreen forest  Forest plantation  Upland rice | Abandoned area/ mine,pit/ grass/scrub  Rice paddy  Agricultural product trading centers, cattle farm house, cemetery, city/town/commercial, recreation area, road, village, factory, institutional land, river, canal, reservoir, lake, marsh and swamp  Eucalyptus, para rubber, bamboo, mixed perennial  Banana, mango, guava, dragon fruit, orange, custard apple, tamarind  Cassava, pineapple, sugarcane  Corn  Dense deciduous forest, disturbed deciduous forest  Dense evergreen forest, disturbed evergreen forest  Dense forest plantation  Upland rice |
| *Final re-grouped land use classes from level 3  Source : Land use map 2013, LDD | |

**Appendix 2** Sensitivity Score of Land Use / Cover Classes by Threat Categories

| Land use class | Habitat suitabilitya | Sensitivity to urban sources of threatsb | Sensitivity to agriculture sources of threatsb | Sensitivity to paved road of threatsb | Sensitivity to dirt road of threatsb |
| --- | --- | --- | --- | --- | --- |
| Abandoned | 0 | 0 | 0 | 0 | 0 |
| Paddy field | 0.2 | 0.5 | 0.3 | 0.3 | 0.1 |
| Built up | 0 | 0 | 0 | 0 | 0 |
| Plantation | 0.85 | 0.5 | 0.3 | 0.3 | 0.1 |
| Mixed orchard | 0.9 | 0.5 | 0.3 | 0.3 | 0.1 |
| Cassava/sugarcane | 0.2 | 0.5 | 0.3 | 0.3 | 0.1 |
| Corn | 0.2 | 0.5 | 0.3 | 0.3 | 0.1 |
| Deciduous forest | 1 | 1 | 1 | 1 | 1 |
| Evergreen forest | 1 | 1 | 1 | 1 | 1 |
| Forest plantation | 0.85 | 0.9 | 0.8 | 0.9 | 0.7 |
| Upland rice | 0.2 | 0.5 | 0.3 | 0.3 | 0.1 |

Note : a : Greater values indicate higher suitability for biodiversity habitat.

b : Greater values indicate higher sensitivity of land use habitat type to threats.

**Appendix 3. Land use demands input**

**Scenario1#** demand.in1

(18 years)

Land use

| Abandoned | Paddy field | Built up area | Rubber plantation | Mixed orchard | Cassava/ sugarcane | Corn | Deciduous forest | Evergreen forest | Forest plantation | Upland rice |
| --- | --- | --- | --- | --- | --- | --- | --- | --- | --- | --- |

12708 8465 10955 17174 9280 5967 29504 56769 73846 16765 3126

12734 8360 11201 17954 9280 5889 29386 56340 73577 16685 3153

12760 8255 11449 18734 9281 5811 29268 55911 73305 16605 3180

12786 8150 11696 19514 9281 5733 29150 55482 73039 16525 3207

12812 8045 11943 20294 9282 5655 29032 55053 72764 16445 3234

12838 7940 12190 21074 9283 5577 28914 54624 72493 16365 3261

12864 7835 12437 21854 9283 5499 28796 54195 72223 16285 3288

12890 7730 12684 22634 9284 5421 28678 53766 71952 16205 3315

12916 7625 12931 23414 9285 5343 28560 53337 71681 16125 3342

12942 7520 13178 24194 9285 5265 28442 52908 71411 16045 3369

12968 7415 13425 24974 9286 5187 28324 52479 71140 15965 3396

12994 7310 13672 25754 9287 5109 28206 52050 70869 15885 3423

13020 7205 13919 26534 9287 5031 28088 51621 70599 15805 3450

13046 7100 14166 27314 9288 4953 27970 51192 70328 15725 3477

13072 6995 14413 28094 9289 4875 27852 50763 70057 15645 3504

13098 6890 14660 28874 9289 4797 27734 50334 69787 15565 3531

13124 6785 14907 29654 9290 4719 27616 49905 69516 15485 3558

13150 6680 15154 30434 9291 4641 27498 49476 69245 15405 3585

**Scenario2#** demand.in1

(18 years)

Land use

| Abandoned | Paddy field | Built up area | Rubber plantation | Mixed orchard | Cassava/ sugarcane | Corn | Deciduous forest | Evergreen forest | Forest plantation | Upland rice |
| --- | --- | --- | --- | --- | --- | --- | --- | --- | --- | --- |

12708 8465 10955 17174 9280 5967 29504 56769 73846 16765 3126

12134 8470 10982 17306 9305 5962 29508 56865 74250 16783 2994

11560 8475 11009 17438 9330 5957 29512 56961 74654 16801 2862

10986 8480 11036 17570 9355 5952 29516 57057 75058 16819 2730

10412 8485 11063 17702 9380 5947 29520 57153 75462 16837 2598

9838 8490 11090 17834 9405 5942 29524 57249 75866 16855 2466

9264 8495 11117 17966 9430 5937 29528 57345 76270 16873 2334

8690 8500 11144 18098 9455 5932 29532 57441 76674 16891 2202

8116 8505 11171 18230 9480 5927 29536 57537 77078 16909 2070

7542 8510 11198 18362 9505 5922 29540 57633 77482 16927 1938

6968 8515 11225 18494 9530 5917 29544 57729 77886 16945 1806

6394 8520 11252 18626 9555 5912 29548 57825 78290 16963 1674

5820 8525 11279 18758 9580 5907 29552 57921 78694 16981 1542

5246 8530 11306 18890 9605 5902 29556 58017 79098 16999 1410

4672 8535 11333 19022 9630 5897 29560 58113 79502 17017 1278

4098 8540 11360 19154 9655 5892 29564 58209 79906 17035 1146

3524 8545 11387 19286 9680 5887 29568 58305 80310 17053 1014

2950 8549 11414 19418 9705 5882 29572 58401 80714 17071 883

**Scenario3#** demand.in1

(18 years)

Land use

| Abandoned | Paddy field | Built up area | Rubber plantation | Mixed orchard | Cassava/ sugarcane | Corn | Deciduous forest | Evergreen forest | Forest plantation | Upland rice |
| --- | --- | --- | --- | --- | --- | --- | --- | --- | --- | --- |

12708 8465 10955 17174 9280 5967 29504 56769 73846 16765 3126

12071 8347 10970 17306 9305 5791 28211 56987 75676 16930 2965

11434 8229 10985 17438 9330 5615 26908 57215 77506 17095 2804

10797 8111 11000 17570 9355 5439 25615 57423 79336 17260 2643

10160 7993 11015 17702 9380 5263 24312 57661 81166 17425 2482

9523 7875 11049 17834 9405 5087 23014 57865 82996 17590 2321

8886 7757 11045 17966 9430 4941 21716 58077 84826 17755 2160

8249 7639 11060 18098 9455 4735 20418 58295 86656 17920 2034

7612 7521 11075 18230 9480 4559 19120 58513 88486 18125 1838

6975 7403 11090 18362 9505 4383 17822 58731 90316 18295 1677

6338 7285 11105 18494 9530 4207 16524 58949 92146 18465 1516

5701 7167 11120 18626 9555 4031 15226 59167 93976 18635 1355

5064 7049 11135 18758 9580 3855 13928 59385 95806 18805 1194

4427 6931 11150 18890 9605 3679 12630 59603 97636 18975 1033

3790 6813 11165 19022 9630 3503 11332 59821 99466 19145 872

3153 6695 11180 19154 9655 3327 10034 60039 10129619315 711

2516 6577 11195 19286 9680 3151 8736 60257 10312619485 550

1879 6459 11210 19418 9705 2975 7438 60475 10495619655 389

|  |
| --- |

***Appendix 4***  *Location Factors Chosen as Hypothesized Driver of Land Use Change*

| Factors | Description | Range | Source |
| --- | --- | --- | --- |
| Elevation (m) | Elevation of pixel (meter above sea level) | 0-1759 | Elevation map |
| Slope (%) | Slope of pixel (%) | 0-85.5 | Elevation map |
| Distance to river (m) | Distance of pixel to river of watershed | 0-3829 | Topographic map, 2010 |
| Distance to villages (m) | Distance of pixel to villages within watershed | 0-19715 | Topographic map, 2010 |
| Distance to roads (m) | Distance of pixel to roads | 0-13664 | Topographic map, 2010 |
| Population density (person/sq.km) | Pixel value on population density; data was aggregated in district level. | 0-19963 | Population data, 2009 |
| Precipitation  (mm/yr) | Pixel value of average annual precipitation | 0-1725 | rain gauge data, 1985-2014 |
| Soil depth  (mm) | Pixel value of soil depth at which root penetration is strongly inhibited | 0-2300 | Soil map, 2009 |

**Appendix 5**  Land Use Conversion Matrix for Various Pairs of Land Use Type

| *Present* | *Future* | | | | | | | | | | |
| --- | --- | --- | --- | --- | --- | --- | --- | --- | --- | --- | --- |
| Abandoned | Paddy field | Built up area | Plantation | Mixed orchard | Cassava/sugarcane | Corn | Deciduous forest | Evergreen forest | Forest plantation | Upland rice |
| Abandoned | 1 | 1 | 1 | 1 | 1 | 1 | 1 | 0 | 0 | 0 | 1 |
| Paddy field | 1 | 1 | 1 | 1 | 1 | 1 | 1 | 0 | 0 | 0 | 0 |
| Built up area | 0 | 0 | 1 | 0 | 0 | 0 | 0 | 0 | 0 | 0 | 0 |
| Rubber plantation | 0 | 0 | 1 | 1 | 1 | 0 | 0 | 0 | 0 | 1 | 0 |
| Mixed orchard | 0 | 0 | 1 | 1 | 1 | 0 | 0 | 0 | 0 | 1 | 0 |
| Cassava/sugarcane | 1 | 1 | 1 | 1 | 1 | 1 | 1 | 0 | 0 | 1 | 0 |
| Corn | 1 | 1 | 1 | 1 | 1 | 1 | 1 | 0 | 0 | 1 | 0 |
| Deciduous forest | 1 | 1 | 1 | 1 | 1 | 1 | 1 | 1 | 1 | 0 | 1 |
| Evergreen forest | 1 | 1 | 1 | 1 | 1 | 1 | 1 | 1 | 1 | 0 | 1 |
| Forest plantation | 1 | 1 | 1 | 1 | 1 | 1 | 1 | 1 | 1 | 1 | 1 |
| Upland rice | 1 | 0 | 1 | 1 | 1 | 1 | 1 | 0 | 0 | 1 | 1 |
|  |  |  |  |  |  |  |  |  |  |  |  |

**Appendix 6**

Land Use Conversion matrix between 1989 and 2000

| *1989* | (% each land use change)  *2000* | | | | | | | | | | | Total |
| --- | --- | --- | --- | --- | --- | --- | --- | --- | --- | --- | --- | --- |
| Abandoned | Paddy rice | Built up area | Rubber plantation | Mixed orchard | Cassava/sugarcane | Corn | Deciduous forest | Evergreen forest | Forest plantation | Upland rice |
| Abandoned | 26.5 | 0.7 | 1.2 | 0.0 | 5.0 | 1.7 | 20.9 | 26.7 | 14.9 | 2.3 | 0.0 | 100 |
| Paddy rice | 8.8 | 57.4 | 10.4 | 0.6 | 10.4 | 2.0 | 8.4 | 1.8 | 0.3 | 0.0 | 0.0 | 100 |
| Built up area | 5.8 | 7.0 | 66.5 | 0.0 | 18.6 | 0.0 | 0.0 | 0.0 | 0.0 | 0.0 | 2.2 | 100 |
| Mixed orchard | 9.7 | 2.5 | 3.5 | 0.4 | 60.7 | 6.6 | 15.3 | 0.0 | 0.0 | 0.6 | 0.8 | 100 |
| Cassava/ sugarcane | 24.9 | 5.2 | 4.4 | 0.1 | 17.6 | 24.6 | 21.2 | 0.0 | 0.0 | 1.8 | 0.3 | 100 |
| Corn | 12.5 | 0.0 | 2.1 | 0.2 | 4.5 | 2.3 | 76.6 | 0.0 | 0.0 | 1.3 | 0.5 | 100 |
| Deciduous forest | 7.1 | 0.2 | 1.3 | 1.3 | 6.7 | 0.9 | 8.5 | 73.9 | 0.0 | 0.0 | 0.1 | 100 |
| Evergreen forest | 0.0 | 0.0 | 2.2 | 0.0 | 0.1 | 0.0 | 6.2 | 0.0 | 90.5 | 0.0 | 1.0 | 100 |
| Forest plantation | 2.5 | 0.0 | 4.6 | 3.0 | 1.4 | 0.1 | 6.8 | 52.9 | 1.4 | 27.3 | 0.0 | 100 |
| Upland rice | 1.0 | 0.0 | 0.8 | 1.6 | 2.6 | 0.0 | 57.1 | 0.0 | 0.0 | 0.2 | 36.8 | 100 |
|  |  |  |  |  |  |  |  |  |  |  |  |  |

Land Use Conversion matrix between 2000 and 2007

| *2000* | (% each land use change)  *2007* | | | | | | | | | | | Total |
| --- | --- | --- | --- | --- | --- | --- | --- | --- | --- | --- | --- | --- |
| Abandoned | Paddy rice | Built up area | Rubber plantation | Mixed orchard | Cassava/sugarcane | Corn | Deciduous forest | Evergreen forest | Forest plantation | Upland rice |
| Abandoned | 23.3 | 1.4 | 3.0 | 2.2 | 8.5 | 4.9 | 20.3 | 29.0 | 4.6 | 2.7 | 0.1 | 100 |
| Paddy rice | 6.3 | 67.1 | 15.5 | 0.5 | 5.1 | 0.7 | 2.6 | 2.2 | 0.0 | 0.0 | 0.0 | 100 |
| Built up area | 0.0 | 0.0 | 100 | 0.0 | 0.0 | 0.0 | 0.0 | 0.0 | 0.0 | 0.0 | 0.0 | 100 |
| Rubber plantation | 2.4 | 3.7 | 8.5 | 5.6 | 2.1 | 0.7 | 4.9 | 48.9 | 1.8 | 21.4 | 0.0 | 100 |
| Mixed orchard | 10.2 | 4.0 | 6.8 | 1.8 | 13.0 | 6.1 | 10.1 | 41.9 | 0.4 | 5.5 | 0.2 | 100 |
| Cassava/ sugarcane | 13.3 | 2.1 | 4.8 | 4.7 | 18.8 | 18.6 | 20.9 | 16.2 | 0.0 | 0.6 | 0.0 | 100 |
| Corn | 14.2 | 1.2 | 5.0 | 2.5 | 7.3 | 2.9 | 30.4 | 19.1 | 12.9 | 1.5 | 3.1 | 100 |
| Deciduous forest | 7.0 | 0.4 | 3.7 | 0.7 | 2.9 | 0.6 | 16.3 | 42.6 | 18.1 | 5.4 | 2.2 | 100 |
| Evergreen forest | 3.3 | 0.0 | 0.3 | 0.0 | 0.1 | 0.0 | 3.4 | 6.1 | 86.7 | 0.0 | 0.0 | 100 |
| Forest plantation | 3.5 | 0.0 | 0.1 | 0.2 | 0.7 | 0.5 | 1.7 | 34.8 | 27.8 | 30.7 | 0.1 | 100 |
| Upland rice | 4.0 | 0.0 | 5.1 | 3.3 | 4.6 | 0.0 | 20.6 | 14.5 | 46.6 | 0.0 | 1.5 | 100 |
|  |  |  |  |  |  |  |  |  |  |  |  |  |

Land Use Conversion matrix between 2007 and 2013

| *2007* | (% each land use change)  *2013* | | | | | | | | | | | Total |
| --- | --- | --- | --- | --- | --- | --- | --- | --- | --- | --- | --- | --- |
| Abandoned | Paddy rice | Built up area | Rubber plantation | Mixed orchard | Cassava/sugarcane | Corn | Deciduous forest | Evergreen forest | Forest plantation | Upland rice |
| Abandoned | 52.3 | 0.1 | 0.7 | 18.5 | 1.0 | 6.1 | 19.9 | 0.0 | 0.0 | 0.4 | 0.9 | 100 |
| Paddy rice | 0.6 | 97.4 | 0.4 | 0.8 | 0.4 | 0.1 | 0.2 | 0.0 | 0.0 | 0.0 | 0.0 | 100 |
| Built up area | 0.0 | 0.0 | 100 | 0.0 | 0.0 | 0.0 | 0.0 | 0.0 | 0.0 | 0.0 | 0.0 | 100 |
| Rubber plantation | 0.0 | 0.0 | 0.0 | 96.4 | 0.7 | 1.2 | 1.7 | 0.0 | 0.0 | 0.0 | 0.0 | 100 |
| Mixed orchard | 0.1 | 0.0 | 0.4 | 12.7 | 77.7 | 3.0 | 5.9 | 0.0 | 0.0 | 0.2 | 0.0 | 100 |
| Cassava/ sugarcane | 0.7 | 0.0 | 0.3 | 32.6 | 5.1 | 52.0 | 9.3 | 0.0 | 0.0 | 0.0 | 0.0 | 100 |
| Corn | 4.3 | 0.0 | 0.4 | 16.3 | 2.1 | 3.7 | 67.5 | 0.4 | 0.0 | 3.3 | 1.9 | 100 |
| Deciduous forest | 0.2 | 0.0 | 0.0 | 3.7 | 0.1 | 1.1 | 1.5 | 90.2 | 0.1 | 3.0 | 0.1 | 100 |
| Evergreen forest | 0.1 | 0.0 | 0.0 | 0.0 | 0.0 | 0.0 | 0.6 | 0.0 | 94.5 | 4.8 | 0.0 | 100 |
| Forest plantation | 0.0 | 0.0 | 0.1 | 1.1 | 0.1 | 0.7 | 0.5 | 0.0 | 0.0 | 97.5 | 0.0 | 100 |
| Upland rice | 3.3 | 0.0 | 0.7 | 3.4 | 0.4 | 0.4 | 12.4 | 0.0 | 0.0 | 0.6 | 78.6 | 100 |
